1 Comparison of throat swabs and sputum specimens for viral nucleic acid  
2 detection in 52 cases of novel coronavirus (SARS-Cov-2) infected  
3 pneumonia (COVID-19)

4

5 Chenyao Lin<sup>1</sup>, Jie Xiang<sup>2</sup>, Mingzhe Yan<sup>2</sup>, Hongze Li<sup>2</sup>, Shuang Huang<sup>1</sup>, and Changxin  
6 Shen<sup>\*1</sup>

7

8 <sup>1</sup>Department of Blood Transfusion, ZhongNan hospital of Wuhan University, China

9 <sup>2</sup>Department of Clinical laboratory, Wuhan Jinyintan Hospital, Wuhan, China

10

11 Chenyao Lin and Jie Xiang are co-first authors; they contributed equally to the work

12

13 \*Corresponding author

14

15 *Correspondence to:* Professor Changxin Shen; Blood Transfusion Department,

16 Zhongnan Hospital of Wuhan University, 169 Donghu Road, Wuhan, Hubei 430071,

17 P.R. China

18 Tel: +86 13871541390 E-mail: [shencx1975@sina.com](mailto:shencx1975@sina.com)

19

20

21 **Key words:** SARS-Cov-2, COVID-19, throat swabs, sputum specimens

22

23

24

25

26

27

1    **Abstract**

2    **Background:** In December 2019, a novel coronavirus (SARS-CoV-2) infected  
3    pneumonia (COVID-19) occurred in Wuhan, China. Diagnostic test based on  
4    real-time reverse transcription polymerase chain reaction assay (qRT-PCR) was the  
5    main means of confirmation, and sample collection was mostly throat swabs, which  
6    was easy to miss the diagnosis. It is necessary to seek specimen types with higher  
7    detection efficiency and accuracy.

8    **Methods:** Paired specimens of throat swabs and sputum were obtained from 54 cases,  
9    and RNA was extracted and tested for 2019-nCoV (equated with SARS-CoV-2) by  
10   qRT-PCR assay.

11   **Results:** The positive rates of 2019-nCoV from sputum specimens and throat swabs  
12   were 76.9% and 44.2%, respectively. Sputum specimens showed a significantly  
13   higher positive rate than throat swabs in detecting viral nucleic acid using qRT-PCR  
14   assay (P=0.001).

15   **Conclusions:** The detection rates of 2019-nCoV from sputum specimens are  
16   significantly higher than throat swabs. We suggest that sputum would benefit for the  
17   detection of 2019-nCoV in patients who produce sputum. The results can facilitate the  
18   selection of specimens and increase the accuracy of diagnosis.

19

20    **Introduction**

21        In December 2019, a novel coronavirus, since named severe acute respiratory  
22    syndrome coronavirus 2 (SARS-Cov-2), emerged in Wuhan, Hubei Province, China<sup>[1]</sup>,  
23    causing an acute febrile illness with acute respiratory distress syndrome (ARDS),  
24    which the World Health Organization (WHO) has named 2019 novel coronavirus  
25    disease (COVID-19).<sup>[2-4]</sup> The type of pneumonia caused by the 2019 novel  
26    coronavirus (2019-nCoV, equated with SARS-CoV-2) is a highly infectious disease,  
27    and the WHO declared the outbreak a public health emergency of international  
28    concern on January 30, 2020.<sup>[5]</sup> As of February 20, 2020, a total of 74679 clinically  
29    diagnosed and laboratory confirmed cases had been reported in China, including 2122

1 cases of death, and more than one thousand exported cases were reported in 26  
2 countries spanning Asia, Europe, Oceania, and North America. The rapid global  
3 expansion and rising fatalities raised concerns about global spread.

4 Full-genome sequencing and phylogenetic analysis indicated that 2019-nCoV was  
5 a distinct clade from the beta-coronaviruses associated with human severe acute  
6 respiratory syndrome (SARS) and Middle East respiratory syndrome (MERS).<sup>[2]</sup> The  
7 2019-nCoV is close similar to bat coronaviruses, with homology of 85-96% to a bat  
8 SARS-like coronavirus (bat-SL-CoVZC45) at the whole genome level<sup>[6]</sup>, and it has  
9 been postulated that bats are the primary source. However, the origin of 2019-nCoV is  
10 still under investigation, current evidence suggested that animal-to-human  
11 transmission via wild animals illegally sold in the Huanan Seafood Wholesale  
12 Market.<sup>[7]</sup>

13 A study in *The Lancet* by Huang et al<sup>[3]</sup> firstly reported 41 cases of COVID-19 in  
14 which most patients had a history of exposure to Huanan Seafood Wholesale Market.  
15 The clinical manifestations of patients included fever, cough, dyspnea, myalgia,  
16 fatigue, normal or decreased leukocyte counts, and radiographic evidence of  
17 pneumonia. Organ dysfunction (such as shock, ARDS, acute cardiac injury and acute  
18 kidney injury) and death can occur in severe cases.<sup>[3]</sup> Signs of infection are highly  
19 nonspecific, thus, diagnostic test based on detection of the viral sequence by real-time  
20 reverse transcription polymerase chain reaction assay (qRT-PCR) is the main means  
21 of confirmation.

22 Appropriate specimen selection is important for the diagnosis of respiratory viral  
23 infections.<sup>[8]</sup> We collected paired specimens of throat swabs and sputum for the first  
24 time. The objective of this study was to compare the positive rates of 2019-nCoV  
25 between throat swabs and sputum specimens in the detection of viral nucleic acid by  
26 qRT-PCR. This facilitates the selection of specimens for detection of 2019-nCoV, and  
27 improve the efficiency of diagnosis for patients suspected of having COVID-19.

28

## 29 **Methods**

### 30 **Study Design and Participants**

1 For this retrospective, single center study, we recruited 52 patients suspected of  
2 having COVID-19 from February 7 to February 16, 2020, at Jinyintan Hospital,  
3 which located in Wuhan, Hubei Province, the endemic areas of COVID-19. Suspected  
4 patients were diagnosed according to World Health Organization interim guidance.<sup>[9]</sup>  
5 All patients enrolled in this study received detection of viral nucleic acid assays  
6 (qRT-PCR) in both throat swabs and sputum specimens at the same time to make a  
7 definite diagnosis. Jinyintan Hospital is a hospital for adults (ie, aged  $\geq 14$  years)  
8 specialising in infectious diseases, and as well the first designated hospital for  
9 COVID-19 patients in Wuhan. The study was approved by Jinyintan Hospital Ethics  
10 Committee and oral consent was obtained from patients involved before enrolment  
11 when data were collected retrospectively.

12

### 13 **qRT-PCR Assay for SARS-CoV-2**

14 Throat swabs and sputum specimens were collected for extracting 2019-nCoV  
15 RNA from patients suspected of having 2019-nCoV infection. After collection, the  
16 throat swabs were placed into a sterile test tube with 1 ml sterile saline, the sputum  
17 specimens were added equal volume of acetylcysteine (10g/L) and shaken at room  
18 temperature for 30 min to be fully liquefied, and total RNA was extracted using the  
19 nucleic acid extraction kit (QIAamp viral RNA mini kit). In brief, 40 $\mu$ L of cell lysates  
20 were transferred into a collection tube followed by vortex for 10 seconds. After  
21 standing at room temperature for 10 minutes, the collection tube was centrifugated at  
22 1000 rpm/min for 5 minutes. The suspension was used for qRT-PCR assay of  
23 2019-nCoV RNA. Then, n\*19  $\mu$ L mixed reagent of fluorescence PCR detection and  
24 n\*1  $\mu$ L RT-PCR enzyme (n was the number of reaction tubes) were mixed and  
25 vortexed for a few seconds. The above mixture of 20  $\mu$ L was put into the PCR  
26 reaction tube respectively, after that the extracted sample by 5  $\mu$ L was added.  
27 qRT-PCR analysis was conducted using the ABI 7500 Real-Time PCR System. The  
28 PCR parameters were 45 °C for 10 min, 95 °C for 3 min, followed by 45 cycles of  
29 95 °C for 15 s, 58 °C for 30 s, and a single fluorescence detection point at 58°C. Two  
30 target genes, including open reading frame 1ab (ORF1ab) and nucleocapsid protein

1 (N), were simultaneously amplified and tested during the qRT-PCR assay. The  
2 qRT-PCR assay was performed using a 2019-nCoV nucleic acid detection kit  
3 according to the manufacturer's protocol (Shanghai ZJ Bio-Tech Co Ltd). A cycle  
4 threshold value (Ct-value) less than 37 was defined as a positive test result, and a  
5 Ct-value of 40 or more was defined as a negative test. These diagnostic criteria were  
6 based on the recommendation by the national institute for viral disease control and  
7 Prevention (China) ([http://ivdc.chinacdc.cn/kyjz/202001/t20200121\\_211337.html](http://ivdc.chinacdc.cn/kyjz/202001/t20200121_211337.html)). A  
8 medium load, defined as a Ct-value of 37 to less than 40, required confirmation by  
9 retesting.

10

## 11 **Statistical Analysis**

12 All analyses were performed using SPSS 22.0. Continuous variables were  
13 described using mean (SD) if they are normally distributed or median (IQR) if they  
14 are not. Categorical variables were expressed as frequencies (percentages), and  
15 performed using the McNemar's test.  $P < 0.05$  was considered statistically significant.

16

## 17 **Results**

### 18 **Presenting Characteristics**

19 The study population included 52 hospitalized patients suspected of having  
20 COVID-19. The average age was 57.3 years (SD, 12.5; range, 34-84 years), and 27  
21 (51.9%) were men. All patients received qRT-PCR assays in both throat swabs and  
22 sputum specimens. (Table 1)

23

### 24 **Comparison of throat swabs and sputum specimens**

25 The viral nucleic acid by qRT-PCR showed that 23 cases (44.2%) of throat swabs  
26 were positive while 29 cases (55.8%) were negative, and 40 cases (76.9%) of sputum  
27 specimens were positive while 12 cases (23.1%) were negative (Figure 1). The  
28 positive rate of sputum specimens was almost 2-fold that of throat swabs.

29 Most of the patients (51.9%) had the same results of qRT-PCR assay on throat  
30 swabs and sputum specimens, 36.5% with both positive and 15.4% with both

1 negative. However, quite a few patients (40.4%) showed positive sputum specimens  
2 and negative throat swabs, while only a tiny minority of patients (7.7%) showed  
3 negative sputum specimens and positive throat swabs. The findings showed that  
4 positive rates displayed a significant statistical difference ( $P=0.001$ ) between throat  
5 swabs and sputum specimens. (Table 2)

## 7 **Discussion**

8 Adequate specimen collection is important for the diagnosis of respiratory viral  
9 infections.<sup>[8]</sup> At present, the sample collection for viral nucleic acid detection of  
10 suspected patients with COVID-19 is mostly upper respiratory tract samples (mainly  
11 throat swabs).<sup>[10]</sup> The collection of throat swabs is not standardized and it is easy to  
12 miss the diagnosis. The collection process is extremely risky for medical staff.  
13 Sputum is representative of the lower respiratory tract but is rarely used for viral  
14 testing. The aim of this study was to compare the detection rates of 2019-nCoV RNA  
15 from throat swabs and sputum specimens using the qRT-PCR assay.

16 In our research, most of the patients were middle-aged and elderly men, which  
17 was similar to previous studies.<sup>[3,4]</sup> Paired specimens of throat swabs and sputum were  
18 obtained from 52 subjects. The positive rates of 2019-nCoV from sputum specimens  
19 and throat swabs were 76.9% and 44.2%, respectively. The present study found that  
20 the overall positive rate from sputum specimens in adults was significantly higher  
21 than that from throat swabs using qRT-PCR assay. This finding was consistent with  
22 the result of a previous study that sputum showed a significantly higher positive rate  
23 than nasopharyngeal swabs in detecting respiratory viruses.<sup>[8]</sup> Falsey et al<sup>[11]</sup> also  
24 proved that sputum samples showed higher diagnostic yields than nose–throat swabs  
25 in adults.

26 The detection rate of 2019-nCoV from sputum samples was higher than that  
27 from throat swabs, which may be related to novel coronavirus's main invasion and  
28 infection of lower respiratory tract cells, resulting in clinical manifestations such as  
29 cough and pneumonia. In addition, several studies have shown that respiratory viruses  
30 were increasingly recognized as the cause of lower respiratory tract infections.<sup>[8]</sup> In

1 these cases, specimens of the lower respiratory tract should be collected for detection  
2 of 2019-nCoV. And caution should be taken when using the negative result of viral  
3 nucleic acid from throat swabs as the criterion for the exclusion of infection and  
4 conformation of cure.

5 It should be noted that the high viscosity of sputum can make it difficult to  
6 extract nucleic acid. Therefore, pre-treatment of sputum samples is required, but  
7 currently no standardized pre-treatment procedure is available for virus detection. In  
8 our study, acetylcysteine was used for the digestion of sputum, which may cause  
9 substantial loss of RNA due to the washing and pipetting steps in the procedures.  
10 Therefore, thoroughly mixing and homogenization of sputum samples might be  
11 important factors to obtain reliable test results.<sup>[8]</sup>

12 This study has several limitations. First, only 52 patients with suspected  
13 COVID-19 were included, and further studies were needed to investigate the  
14 observation in a larger group of patients. Second, our study only involved throat  
15 swabs and sputum samples, and expand discussions of bronchoalveolar lavage fluid  
16 and blood samples are necessary in the future. Although sputum is more sensitive than  
17 throat swabs for 2019-nCoV detection, the use of sputum may be limited because not  
18 all patients with COVID-19 produce sputum, especially elderly patients. Therefore, if  
19 a sputum sample is available, it might be a rather reliable specimen for nucleic acid  
20 detection of 2019-nCoV.

21 In conclusion, the detection rates of 2019-nCoV from sputum specimens are  
22 significantly higher than those from throat swabs using the qRT-PCR assay. We  
23 suggest that sputum would benefit for the detection of novel coronavirus in patients  
24 who produce sputum. The results can facilitate the selection of specimens and  
25 increase the accuracy of diagnosis of COVID-19.

26

## 27 **Acknowledgements**

28 This work was supported by the Zhongnan Hospital of Wuhan University  
29 Science, Technology and Innovation Seed Fund under Grant znp2017022.

30

1     **Disclosure statement**

2             The authors have no conflict of interest.

3

4     **References:**

- 5     1.     Wuhan Municipal Health Commission. Wuhan Municipal Health Commission briefing on the  
6             pneumonia epidemic situation 31 Dec 2019 [in Chinese]. 2020 [cited 2020 Feb 20].  
7             <http://wjw.wuhan.gov.cn/front/web/showDetail/2019123108989>. Accessed.
- 8     2.     Zhu N, Zhang D, Wang W, et al. A Novel Coronavirus from Patients with Pneumonia in China,  
9             2019 [J]. *N Engl J Med*. 2020;382(8):727-733.
- 10    3.     Huang C, Wang Y, Li X, et al. Clinical features of patients infected with 2019 novel coronavirus  
11            in Wuhan, China [J]. *Lancet*. 2020;395(10223):497-506.
- 12    4.     Wang D, Hu B, Hu C, et al. Clinical Characteristics of 138 Hospitalized Patients With 2019  
13            Novel Coronavirus-Infected Pneumonia in Wuhan, China [J]. *Jama*. 2020.
- 14    5.     World Health Organization. Statement on the second meeting of the International Health  
15            Regulations (2005) Emergency Committee regarding the outbreak of novel coronavirus  
16            (2019-nCoV). Geneva: the Organization; 2020 [cited 2020 Feb 20].  
17            [https://www.who.int/news-room/detail/30-01-2020-statement-on-the-second-meeting-of-the-international-health-regulations-\(2005\)-emergency-committee-regarding-the-outbreak-of-novel-coronavirus-\(2019-ncov\)](https://www.who.int/news-room/detail/30-01-2020-statement-on-the-second-meeting-of-the-international-health-regulations-(2005)-emergency-committee-regarding-the-outbreak-of-novel-coronavirus-(2019-ncov)). Accessed.
- 18    6.     Zhou P, Yang XL, Wang XG, et al. A pneumonia outbreak associated with a new coronavirus of  
19            probable bat origin [J]. *Nature*. 2020.
- 20    7.     Chen N, Zhou M, Dong X, et al. Epidemiological and clinical characteristics of 99 cases of 2019  
21            novel coronavirus pneumonia in Wuhan, China: a descriptive study [J]. *Lancet*.  
22            2020;395(10223):507-513.
- 23    8.     Jeong JH, Kim KH, Jeong SH, et al. Comparison of sputum and nasopharyngeal swabs for  
24            detection of respiratory viruses [J]. *J Med Virol*. 2014;86(12):2122-2127.
- 25    9.     World Health Organization. Clinical management of severe acute respiratory infection when  
26            novel coronavirus (nCoV) infection is suspected: interim guidance. 2020 [cited 2020 Feb 20].  
27            [https://www.who.int/publications-detail/clinical-management-of-severe-acute-respiratory-infection-when-novel-coronavirus-\(ncov\)-infection-is-suspected](https://www.who.int/publications-detail/clinical-management-of-severe-acute-respiratory-infection-when-novel-coronavirus-(ncov)-infection-is-suspected). Accessed.
- 28    10.    Xie X, Zhong Z, Zhao W, et al. Chest CT for Typical 2019-nCoV Pneumonia: Relationship to  
29            Negative RT-PCR Testing [J]. *Radiology*. 2020:200343.
- 30    11.    Falsey AR, Formica MA, Walsh EE. Yield of sputum for viral detection by reverse transcriptase  
31            PCR in adults hospitalized with respiratory illness [J]. *J Clin Microbiol*. 2012;50(1):21-24.
- 32
- 33
- 34



**Table 1.** The clinical data and nucleic acid detection results (qRT-PCR) of 52 patients

| NO. | Unique traceability number | Gender | age (years) | throat swabs collection date | throat swabs results | sputum specimens collection date | sputum specimens results |
|-----|----------------------------|--------|-------------|------------------------------|----------------------|----------------------------------|--------------------------|
| 1   | 233492                     | Female | 49          | 2020/2/14                    | positive             | 2020/2/13                        | positive                 |
| 2   | 233502                     | Female | 47          | 2020/2/12                    | negative             | 2020/2/13                        | positive                 |
| 3   | 233428                     | Male   | 80          | 2020/2/13                    | positive             | 2020/2/13                        | positive                 |
| 4   | 233389                     | Female | 73          | 2020/2/12                    | negative             | 2020/2/13                        | positive                 |
| 5   | 233445                     | Female | 54          | 2020/2/13                    | negative             | 2020/2/13                        | positive                 |
| 6   | 233512                     | Female | 63          | 2020/2/12                    | negative             | 2020/2/13                        | positive                 |
| 7   | 232932                     | Male   | 67          | 2020/2/14                    | positive             | 2020/2/13                        | positive                 |
| 8   | 231688                     | Male   | 47          | 2020/2/13                    | positive             | 2020/2/13                        | positive                 |
| 9   | 232712                     | Female | 72          | 2020/2/7                     | negative             | 2020/2/13                        | positive                 |
| 10  | 233473                     | Male   | 49          | 2020/2/12                    | negative             | 2020/2/13                        | positive                 |
| 11  | 232360                     | Male   | 69          | 2020/2/11                    | negative             | 2020/2/13                        | positive                 |
| 12  | 233495                     | Female | 57          | 2020/2/12                    | negative             | 2020/2/13                        | positive                 |
| 13  | 233386                     | Male   | 79          | 2020/2/13                    | negative             | 2020/2/13                        | positive                 |
| 14  | 233501                     | Female | 34          | 2020/2/13                    | negative             | 2020/2/13                        | positive                 |
| 15  | 233429                     | Female | 67          | 2020/2/13                    | positive             | 2020/2/13                        | positive                 |
| 16  | 233127                     | Male   | 54          | 2020/2/9                     | negative             | 2020/2/14                        | positive                 |
| 17  | 233557                     | Female | 64          | 2020/2/14                    | positive             | 2020/2/14                        | positive                 |
| 18  | 233491                     | Female | 35          | 2020/2/14                    | negative             | 2020/2/14                        | positive                 |
| 19  | 233552                     | Female | 47          | 2020/2/14                    | positive             | 2020/2/14                        | positive                 |

|    |        |        |    |           |          |           |          |
|----|--------|--------|----|-----------|----------|-----------|----------|
| 20 | 233559 | Female | 66 | 2020/2/14 | positive | 2020/2/14 | positive |
| 21 | 233159 | Male   | 57 | 2020/2/9  | positive | 2020/2/14 | positive |
| 22 | 233077 | Female | 66 | 2020/2/13 | positive | 2020/2/14 | positive |
| 23 | 233548 | Female | 39 | 2020/2/15 | negative | 2020/2/14 | negative |
| 24 | 233185 | Male   | 59 | 2020/2/14 | negative | 2020/2/14 | positive |
| 25 | 233514 | Male   | 52 | 2020/2/12 | negative | 2020/2/14 | positive |
| 26 | 233352 | Male   | 64 | 2020/2/13 | negative | 2020/2/14 | positive |
| 27 | 233259 | Male   | 62 | 2020/2/14 | negative | 2020/2/14 | positive |
| 28 | 233554 | Male   | 55 | 2020/2/14 | positive | 2020/2/14 | positive |
| 29 | 233553 | Female | 63 | 2020/2/14 | positive | 2020/2/14 | positive |
| 30 | 233540 | Female | 71 | 2020/2/13 | positive | 2020/2/14 | negative |
| 31 | 233558 | Male   | 58 | 2020/2/14 | negative | 2020/2/14 | positive |
| 32 | 233467 | Male   | 51 | 2020/2/16 | positive | 2020/2/14 | negative |
| 33 | 233566 | Female | 44 | 2020/2/14 | positive | 2020/2/14 | positive |
| 34 | 233555 | Male   | 55 | 2020/2/14 | negative | 2020/2/14 | negative |
| 35 | 232525 | Male   | 40 | 2020/2/13 | negative | 2020/2/14 | negative |
| 36 | 233549 | Male   | 49 | 2020/2/13 | positive | 2020/2/14 | negative |
| 37 | 232342 | Male   | 36 | 2020/2/12 | negative | 2020/2/14 | negative |
| 38 | 233494 | Female | 59 | 2020/2/12 | negative | 2020/2/14 | negative |
| 39 | 232697 | Female | 46 | 2020/2/13 | negative | 2020/2/14 | positive |
| 40 | 232825 | Female | 59 | 2020/2/13 | negative | 2020/2/14 | negative |
| 41 | 233489 | Female | 72 | 2020/2/13 | positive | 2020/2/14 | positive |

|    |        |        |    |           |          |           |          |
|----|--------|--------|----|-----------|----------|-----------|----------|
| 42 | 233546 | Female | 56 | 2020/2/15 | negative | 2020/2/14 | positive |
| 43 | 233425 | Female | 51 | 2020/2/13 | negative | 2020/2/14 | negative |
| 44 | 233340 | Male   | 75 | 2020/2/13 | positive | 2020/2/14 | positive |
| 45 | 233470 | Male   | 47 | 2020/2/16 | positive | 2020/2/15 | positive |
| 46 | 233155 | Male   | 76 | 2020/2/10 | positive | 2020/2/15 | positive |
| 47 | 233098 | Male   | 38 | 2020/2/13 | positive | 2020/2/15 | negative |
| 48 | 233561 | Female | 84 | 2020/2/14 | positive | 2020/2/15 | positive |
| 49 | 233550 | Male   | 60 | 2020/2/15 | negative | 2020/2/15 | positive |
| 50 | 233214 | Male   | 47 | 2020/2/14 | positive | 2020/2/15 | positive |
| 51 | 233568 | Male   | 72 | 2020/2/15 | negative | 2020/2/15 | positive |
| 52 | 232512 | Male   | 41 | 2020/2/13 | negative | 2020/2/15 | negative |

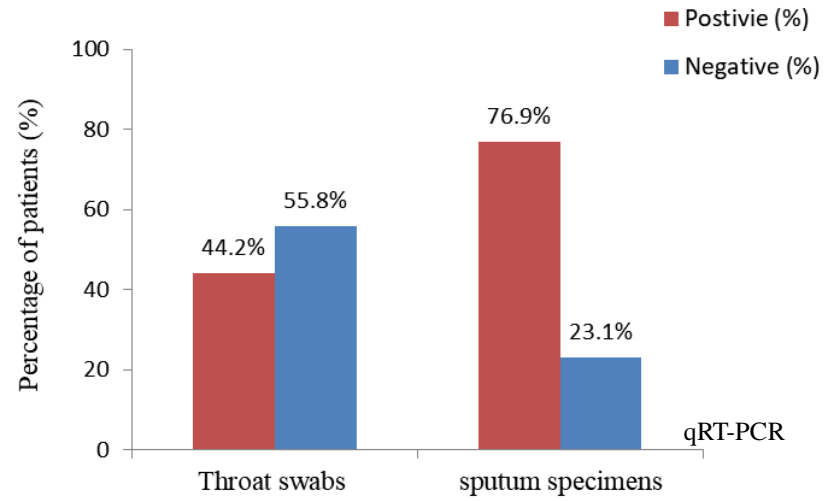

**Figure 1.** Distribution of qRT-PCR results on throat swabs and sputum specimens in patients with suspected COVID-19.

**Table 2.** Comparison of qRT-PCR results between throat swabs and sputum specimens

|                                | No. (%) of sputum specimens result |           |
|--------------------------------|------------------------------------|-----------|
|                                | Positive                           | Negative  |
| No. (%) of throat swabs result |                                    |           |
| Positive                       | 19 (36.5%)                         | 4 (7.7%)  |
| Negative                       | 21 (40.4%)                         | 8 (15.4%) |

*P* value = 0.001 by McNemar test.
